# Supplementary material
Source: PubMed Central journal article supplement (PMC9437900)
Supplement: NIHMS1832384-supplement-Appendix__Male_suicide_across_the_lifespan_by_known_MH_status.pdf [file NIHMS1832384-supplement-Appendix__Male_suicide_across_the_lifespan_by_known_MH_status.pdf]

**Appendix**  
**Suicide Among Males Across the Lifespan: An Analysis of Differences by Known Mental Health Status**  
**Fowler et al.**

**APPENDIX TEXT 1**

Data for this study comes from the following 41 states/jurisdictions: Alaska, Arizona, Colorado, Connecticut, Georgia, Illinois, Indiana, Iowa, Kansas, Kentucky, Maine, Maryland, Massachusetts, Michigan, Minnesota, New Hampshire, New Jersey, New Mexico, New York, North Carolina, Ohio, Oklahoma, Oregon, Pennsylvania, Rhode Island, South Carolina, Vermont, Virginia, Washington, Wisconsin (2016–2018); Hawaii (2016); California, Delaware, the District of Columbia, Nevada, Puerto Rico, West Virginia (2017–2018); Alabama, Louisiana, Missouri, and Nebraska (2018). Illinois, Pennsylvania, and Washington collected data on  $\geq 80\%$  of violent deaths in their state, in accordance with requirements under which these states were funded. Data for California represent violent deaths that occurred in 4 counties (Los Angeles, Sacramento, Shasta, and Siskiyou) in 2017, and in 21 counties (Amador, Butte, Fresno, Humboldt, Imperial, Kern, Kings, Lake, Los Angeles, Marin, Mono, Placer, Sacramento, San Benito, San Mateo, San Diego, San Francisco, Shasta, Siskiyou, Ventura, and Yolo) in 2018. All other states and jurisdictions provided data from all areas.

**Appendix**  
**Suicide Among Males Across the Lifespan: An Analysis of Differences by Known Mental Health Status**  
**Fowler et al.**

## **APPENDIX TEXT 2**

“Diagnosed mental health problem” is defined in the NVDRS as follows: “Mental health problems include those disorders and syndromes listed in the DSM-5 with the exception of alcohol and other substance dependence (as these are captured in separate variables). Examples of disorders qualifying as mental health problems include diagnoses such as major depression, schizophrenia, and generalized anxiety disorder, as well as neurodevelopmental disorders (such as intellectual disability, autism, attention-deficit/hyperactivity disorder), eating disorders, personality disorders, and organic mental disorders (such as Alzheimer’s and other dementias). Also indicate ‘Yes’ if it is mentioned in the source document that the victim was being treated for a mental health problem, even if the nature of the problem is unclear (e.g., ‘was being treated for various psychiatric problems’).” See the NVDRS Coding Manual for more details regarding all variables included in this analysis:

<https://www.cdc.gov/violenceprevention/pdf/nvdrs/nvdrsCodingManual.pdf>
